# Supplementary material for: Changes in Sleep Patterns and Disorders in Children and Adolescents with Attention Deficit Hyperactivity Disorders and Autism Spectrum Disorders during the COVID-19 Lockdown
Source: MDPI journal article supplement (doi:10.3390/brainsci11091139), 2021-08-27

## **SUPPLEMENTARY MATERIALS**

### **Changes in sleep patterns and disorders in children and adolescents with Attention Deficit Hyperactivity Disorders and Autism Spectrum Disorders during the COVID-19 lockdown**

Oliviero Bruni, MD<sup>1\*</sup>, Maria Breda, MD<sup>2</sup>, Raffaele Ferri, MD<sup>3</sup>, Maria Grazia Melegari, MD<sup>1</sup>,

*<sup>1</sup>Department of Developmental and Social Psychology, Sapienza University, Rome, Italy*

*<sup>2</sup>Child Neurology and Psychiatry Unit, Department of Human Neurosciences, Sapienza University, Rome, Italy*

*<sup>3</sup>Sleep Research Centre, Department of Neurology IC, Oasi Research Institute - IRCCS, Troina, Italy*

#### **Address correspondence to:**

\*Oliviero Bruni MD

Department of Social and Developmental Psychology, Sapienza University

Via dei Marsi 78 - 00185 Rome, Italy

Telephone number + 39-3356078964

email: [oliviero.bruni@uniroma1.it](mailto:oliviero.bruni@uniroma1.it)

# SUPPLEMENTARY MATERIAL

**Supplementary Table S1.** Sleep disorders before and during lockdown in the three groups.

|                                    |               | ADHD %            | p                | ASD %             | p            | CONT %            | p                |
|------------------------------------|---------------|-------------------|------------------|-------------------|--------------|-------------------|------------------|
| <i>Difficulties falling asleep</i> | <i>before</i> | <b>64 (27.1%)</b> | <b>0.001</b>     | <b>23 (23.0%)</b> | <b>0.029</b> | 72 (21.2%)        | 0.500            |
|                                    | <i>during</i> | <b>92 (39.0%)</b> |                  | <b>35 (35.0%)</b> |              | 65 (19.1%)        |                  |
| <i>Anxiety at bedtime</i>          | <i>before</i> | <b>36 (15.3%)</b> | <b>0.007</b>     | <b>12 (12.0%)</b> | <b>0.006</b> | <b>19 (5.6%)</b>  | <b>0.003</b>     |
|                                    | <i>during</i> | <b>56 (23.7%)</b> |                  | <b>22 (22.0%)</b> |              | <b>38 (11.2%)</b> |                  |
| <i>Hypnic jerks</i>                | <i>before</i> | 30 (12.7%)        | 0.136            | 11 (11.0%)        | 1.000        | 14 (4.1%)         | 1.000            |
|                                    | <i>during</i> | 39 (16.5%)        |                  | 12 (12.0%)        |              | 13 (3.8%)         |                  |
| <i>Rhythmic movement dis.</i>      | <i>before</i> | 10 (4.2%)         | 0.424            | 7 (7.0%)          | 0.625        | 5 (1.5%)          | 0.500            |
|                                    | <i>during</i> | 14 (5.9%)         |                  | 9 (9.0%)          |              | 7 (2.1%)          |                  |
| <i>Night awakenings &gt;2</i>      | <i>before</i> | 29 (12.3%)        | 0.500            | 10 (10.0%)        | 0.115        | 11 (3.2%)         | 0.052            |
|                                    | <i>during</i> | 34 (14.4%)        |                  | 18 (18.0%)        |              | 21 (6.2%)         |                  |
| <i>Restless sleep</i>              | <i>before</i> | 80 (33.9%)        | 0.780            | 28 (28.0%)        | 0.327        | 75 (22.1%)        | 0.659            |
|                                    | <i>during</i> | 83 (35.2%)        |                  | 34 (34.0%)        |              | 71 (20.9%)        |                  |
| <i>Snoring/apneas</i>              | <i>before</i> | 19 (8.1%)         | 0.453            | 8 (8.0%)          | 1.000        | 13 (3.8%)         | 1.000            |
|                                    | <i>during</i> | 22 (9.3%)         |                  | 9 (9.0%)          |              | 12 (3.5%)         |                  |
| <i>Sleepwalking</i>                | <i>before</i> | <b>1 (0.4%)</b>   | <b>&lt;0.001</b> | 3 (3.0%)          | 0.125        | <b>0 (0.0%)</b>   | <b>&lt;0.001</b> |
|                                    | <i>during</i> | <b>14 (5.9%)</b>  |                  | 7 (7.0%)          |              | <b>8 (2.4%)</b>   |                  |
| <i>Sleep terrors</i>               | <i>before</i> | 3 (1.3%)          | 1.000            | 0 (0.0%)          | 0.133        | 4 (1.2%)          | 0.625            |
|                                    | <i>during</i> | 4 (1.7%)          |                  | 4 (4.0%)          |              | 2 (0.6%)          |                  |
| <i>Bruxism</i>                     | <i>before</i> | <b>39 (16.5%)</b> | <b>0.015</b>     | 7 (7.0%)          | 0.219        | 31 (9.1%)         | 0.052            |
|                                    | <i>during</i> | <b>26 (11.0%)</b> |                  | 11 (11.0%)        |              | 21 (6.2%)         |                  |
| <i>Nightmares</i>                  | <i>before</i> | 28 (11.9%)        | 0.065            | 2 (2.0%)          | 0.250        | <b>16 (4.7%)</b>  | <b>0.003</b>     |
|                                    | <i>during</i> | 42 (17.8%)        |                  | 5 (5.0%)          |              | <b>35 (10.3%)</b> |                  |
| <i>Daytime sleepiness</i>          | <i>before</i> | <b>29 (12.3%)</b> | <b>0.005</b>     | <b>4 (4.0%)</b>   | <b>0.003</b> | <b>15 (4.4%)</b>  | <b>0.029</b>     |
|                                    | <i>during</i> | <b>47 (19.9%)</b> |                  | <b>15 (15.0%)</b> |              | <b>27 (7.9%)</b>  |                  |

Significant differences at  $p < 0.05$  are in bold.

**Supplementary Figure S1.** Sleep disorders in the three groups before lockdown.

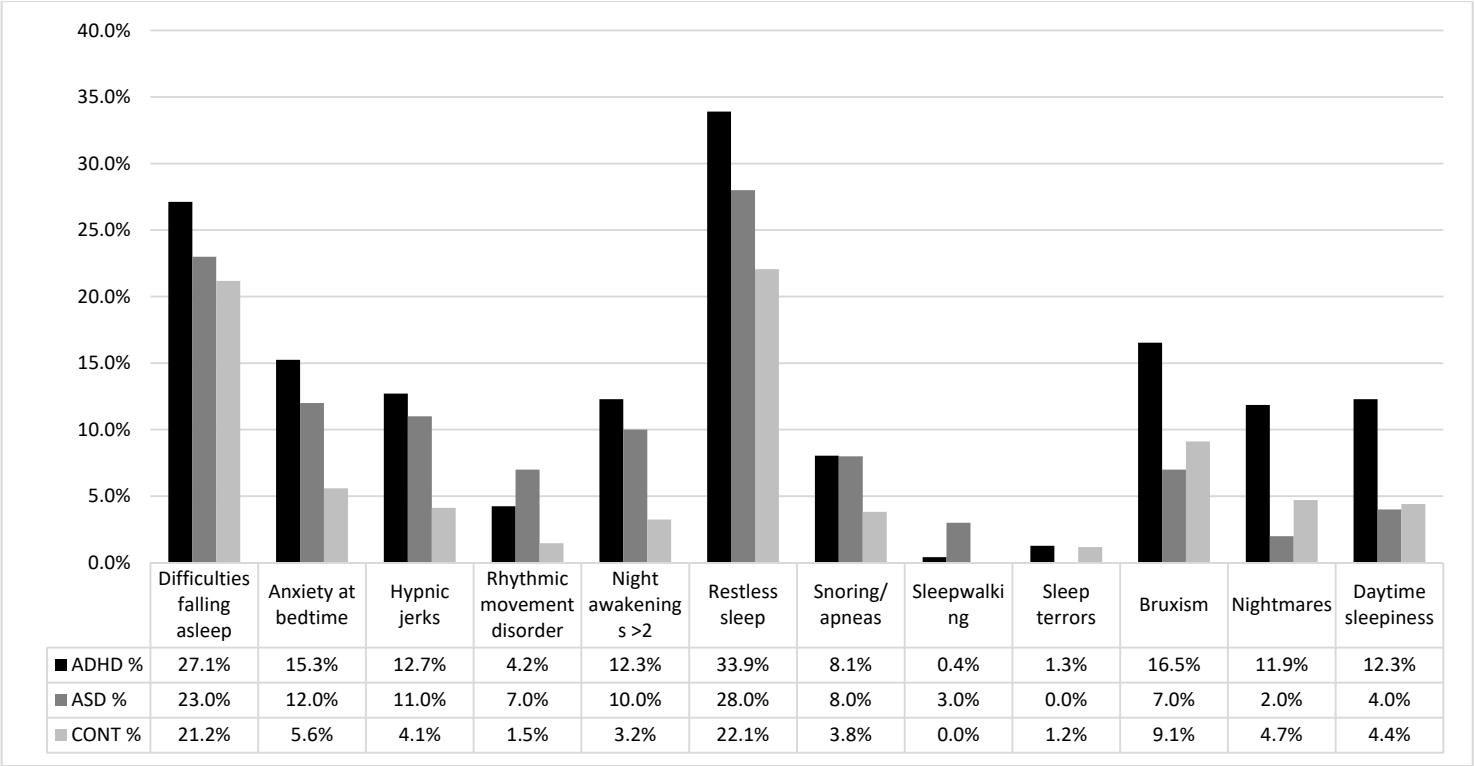

**Supplementary Figure S2.** Sleep disorders in the three groups during lockdown.

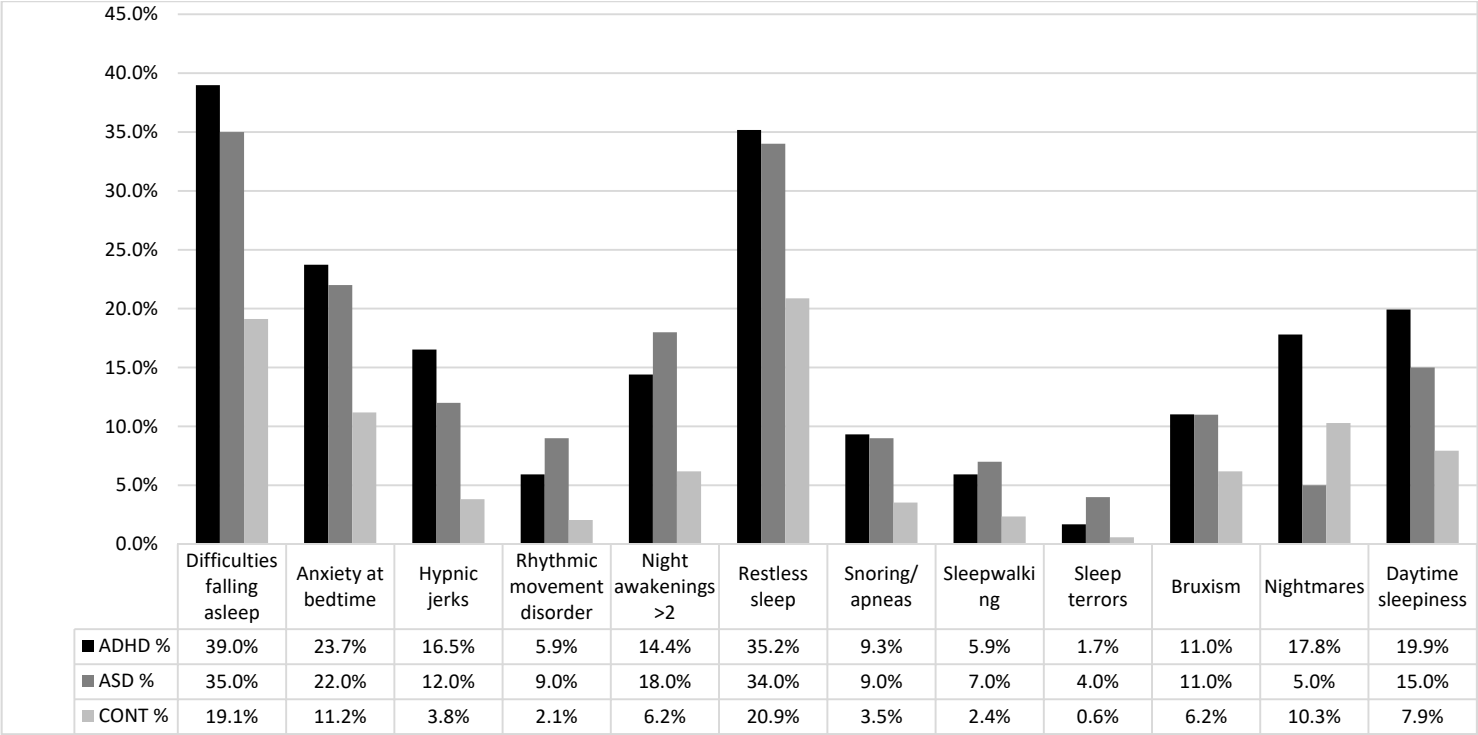

Supplement: s1 [file s1]
